# Supplementary material for: From molecular salt to layered network: cation-driven tuning of band gap, structure, and charge transport in A 3 Bi 2 I 9 (A = Cs, Rb) perovskites
Source: Royal Society of Chemistry journal article supplement (doi:10.1039/d4ra04464a), 2024-01-01
Supplement: d4ra04464a1.pdf [file d4ra04464a1.pdf]

## Supporting Information

### From Molecular Salt to Layered Network: Cation-Driven Tuning of Band Gap, Structure, and Charge Transport in $A_3Bi_2I_9$ (A= Cs, Rb) Perovskites

Mohamed Bouzidi,<sup>a, b, \*</sup> Mohamed Ben Bechir,<sup>c, \*\*</sup> Dhaifallah R. Almalawi,<sup>d</sup> Idris H. Smaili,<sup>e</sup> Fahad Aljuaid,<sup>f</sup>

<sup>a</sup> Department of Physics, College of Science, University of Ha'il, P.O. Box 2440, Hail, Saudi Arabia.

<sup>b</sup> Laboratoire de Recherche sur les Hétéro-Epitaxies et Applications, Faculty of Science of Monastir, University of Monastir, Monastir 5000, Tunisia.

<sup>c</sup> Laboratory of Spectroscopic and Optical Characterization of Materials (LaSCOM), Faculty of Sciences, University of Sfax, BP1171 – 3000 Sfax, Tunisia.

<sup>d</sup> Department of Physics, College of Science, Taif University, Taif 21944, Saudi Arabia.

<sup>e</sup> Department of Electrical and Electronic Engineering, College of Engineering and Computer Science, Jazan University, P. O. Box114, Jazan 45142, Saudi Arabia

<sup>f</sup> Applied College at Mahayel Asir, King Khalid University, Abha, Saudi Arabia.

### Supplementary Equations

$$\alpha = \alpha_0 e^{\left(\frac{h\nu}{E_u}\right)} \quad (S1)$$

where  $\alpha_0$  represents a fixed value.

$$n_{trap} = \frac{2\varepsilon\varepsilon_0V_{TFL}}{eL^2} \quad (S2)$$

where :

- Vacuum permittivity ( $\varepsilon_0$ ) : A universal constant representing the permittivity of free space ( $8.85 \times 10^{-12}$  F/m).
- Dielectric constant ( $\varepsilon$ ) : This parameter reflects the ability of  $A_3Bi_2I_9$  (A = Cs, Rb) to store electrical energy compared to a vacuum, which equal to 4.3 and 20.8 for  $Cs_3Bi_2I_9$  and  $Rb_3Bi_2I_9$ , respectively [1, 2].

- Elementary charge (e) : A fundamental constant representing the charge of an electron ( $1.6 \times 10^{-19}$  C).
- Sample thickness (L) : The distance taken across the space-charge region (SC) within  $A_3Bi_2I_9$  (A = Cs, Rb) (~1 mm for both material).

$$Z(\omega) = Z'(\omega) + jZ''(\omega) \quad (S3)$$

$$\sigma_{AC} = \omega \varepsilon' \varepsilon_0 \tan \delta \quad (S4)$$

where  $\varepsilon_0$  denotes the permittivity of vacuum.

$$\sigma_{AC}(\omega) = \sigma_{DC} + \sigma_0 f^s \quad (S5)$$

The equation incorporates separate terms for DC (direct current) and AC (alternating current) conductivity, represented by  $\sigma_{DC}$  and  $\sigma_{AC}$ , respectively. Additionally, a constant term ( $\sigma_0$ ) and a frequency-dependent term are included.

The frequency-dependent term accounts for the influence of frequency on the overall conductivity. It involves a parameter, "s," which reflects the degree of interaction between charge carriers and the crystal lattice of  $A_3Bi_2I_9$  (A = Cs, Rb). This parameter "s" can range from 0 to 1, where:

- s closer to 0 indicates weaker interaction between charge carriers and the lattice, resulting in a more significant contribution from AC conductivity.
- s closer to 1 signifies stronger interaction, leading to a dominant DC conductivity component.

$$\sigma_{DC} = \sigma_0 e^{\frac{-E_a}{k_B T}} \quad (S6)$$

Where :

- Activation energy ( $E_a$ ): This parameter represents the minimum energy barrier that charge carriers must overcome to participate in conduction. A higher activation energy signifies a lower conductivity at a given temperature.
- Pre-exponential factor ( $\sigma_0$ ): This constant term reflects the intrinsic conductivity of the material and the conduction mechanism. It essentially represents the theoretical conductivity at infinitely high temperature.
- Boltzmann constant ( $k_B$ ): This fundamental constant (approximately  $1.38 \times 10^{-23}$  J/K) relates the average kinetic energy of particles to temperature.
- Absolute temperature (T): This parameter is measured in Kelvin (K) and influences the mobility and concentration of charge carriers within the material. Higher temperatures generally lead to increased conductivity due to enhanced thermal excitation of charge carriers.

$$W_H = W_{H0} \times \left(1 - \frac{r_p}{R}\right) \quad (S7)$$

Where :

- Polaron hopping energy ( $W_H$ ): This parameter represents the minimum energy required for a charge carrier (polaron) to overcome the energy barrier and hop from one lattice site to another. A higher  $W_H$  signifies a more significant energy obstacle for hopping and potentially lower conductivity.
- Large polaron radius ( $r_p$ ): This parameter reflects the extent of lattice distortion surrounding a polaron. A larger radius ( $r_p$ ) can indicate stronger polaron-lattice interaction, potentially affecting hopping mobility.

$$W_{H0} = \frac{e^2}{4 \epsilon_p r_p} \quad (S8)$$

- Effective dielectric constant ( $\epsilon_p$ ): This parameter reflects the overall ability of the material to store electrical energy, accounting for both the intrinsic lattice polarization and any additional contributions from polarizable species within the material.
- Intersite separation ( $R$ ): This parameter represents the average distance between neighboring lattice sites where charge carriers can potentially hop. A smaller intersite separation ( $R$ ) can facilitate hopping due to the closer proximity of available sites.

The expression of AC conductivity according to the OLPT model:

$$\sigma_{ac} = \frac{\pi^4 e^2 k_B^2 T^2 \alpha^{-1} \omega [N(E_F)]^2 R_\omega^4}{12 (2 \alpha k_B T + W_{H0} r_p / R_\omega^2)} \quad (S9)$$

$$(R_\omega')^2 + (\beta W_{H0} + \ln(\omega \tau_0)) R_\omega' - \beta W_{H0} r_p' = 0 \quad (S10)$$

where  $R_\omega' = 2\alpha R_\omega$ ,  $\beta = 1/k_B T$  and  $r_p' = 2\alpha r_p$ .

The expression of the parameter  $s$  according to the OLPT model:

$$s = 1 - \frac{8\alpha R_\omega + \frac{6W_{H0} r_p}{R_\omega k_B T}}{\left[ 2\alpha R_\omega + \frac{W_{H0} r_p}{R_\omega k_B T} \right]^2} \quad (S11)$$

The expression of the parameter  $s$  according to the NSPT model:

$$s = 1 + \frac{4k_B T}{W_m} \quad (S12)$$

where :

- Polaron transfer energy ( $W_m$ ): This parameter represents the minimum energy barrier required for a polaron (a quasiparticle formed by a charge carrier and its surrounding lattice distortion) to move from one lattice site to another. A higher  $W_m$  signifies a greater energy obstacle for hopping and potentially lower conductivity.

The expression of AC conductivity according to the NSPT model:

$$\sigma_{ac} = \frac{(\pi e)^2 k_B T \alpha^{-1} \omega [N(E_F)]^2 R_\omega^4}{12} \quad (S13)$$

where

$$R_\omega = \frac{1}{2\alpha} \left[ \ln\left(\frac{1}{\omega\tau_0}\right) - \frac{W_m}{k_B T} \right] \quad (S14)$$

where :

- Density of states at the Fermi level ( $N(E_F)$ ): This parameter represents the number of available electronic states per unit energy near the Fermi level (the energy level at which the probability of finding an electron is 50%). A higher density of states ( $N(E_F)$ ) can facilitate tunneling due to the increased availability of unoccupied states for electrons to tunnel into.
- Spatial extension of the polaron ( $\alpha^{-1}$ ): This parameter reflects the inverse of the polaron size, essentially indicating the extent of the wavefunction associated with the polaron. A smaller polaron size (larger  $\alpha^{-1}$ ) can potentially enhance tunneling probability due to a more localized wavefunction and increased overlap with neighboring sites.
- Tunneling distance ( $R_\omega$ ): This parameter represents the distance between the initial and final positions of the charge carrier during the tunneling event. A smaller tunneling distance ( $R_\omega$ ) generally increases the tunneling probability due to the weaker energetic barrier that needs to be overcome.

## Supplementary Tables

**Table S1.** Raman Spectrum Assignment for  $A_3Bi_2I_9$  ( $A = Cs, Rb$ ) Perovskites.

| <i>Cs<sub>3</sub>Bi<sub>2</sub>I<sub>9</sub></i> |                 |                                                                                             |                                    |
|--------------------------------------------------|-----------------|---------------------------------------------------------------------------------------------|------------------------------------|
| <i>Vibration</i>                                 | <i>Symmetry</i> | <i>Description</i>                                                                          | <i>Frequency (cm<sup>-1</sup>)</i> |
| $\nu_1$                                          | $A'_1$          | terminal Bi-I symmetric stretch mode                                                        | 144                                |
| $\nu_{15}$                                       | $E''$           | terminal Bi-I asymmetric stretch mode                                                       | 126                                |
| $\nu_{10}$                                       | $E'$            | terminal Bi-I asymmetric stretch mode                                                       | 121                                |
| $\nu_2$                                          | $A_1^1$         | bridge Bi-I symmetric stretch mode                                                          | 111                                |
| $\nu_7$                                          | $E''$           | bridge Bi-I asymmetric stretch mode                                                         | 92                                 |
|                                                  |                 | Bi-I bending mode                                                                           | 59                                 |
|                                                  |                 | unidentified: Cs-[Bi <sub>2</sub> I <sub>9</sub> ] elongation or alternate deformation mode | 44                                 |
| <i>Rb<sub>3</sub>Bi<sub>2</sub>I<sub>9</sub></i> |                 |                                                                                             |                                    |
| $\nu_1$                                          | $A_{1g}$        | Bi-I symmetric stretch mode                                                                 | 141                                |
| $\nu_2$                                          | $E_g$           | Bi-I asymmetric stretch mode                                                                | 127                                |
| $\nu_5$                                          | $F_{2g}$        | Bi-I bending mode                                                                           | 73                                 |
|                                                  |                 | unidentified: Bi – I bending or lattice distortion mode                                     | 66                                 |
|                                                  |                 |                                                                                             | 58                                 |
|                                                  |                 |                                                                                             | 50                                 |

**Table S2.** Temperature Dependence of Equivalent Circuit Model Parameters for  $A_3Bi_2I_9$  ( $A = Cs, Rb$ ) Perovskites.

| <i>Cs<sub>3</sub>Bi<sub>2</sub>I<sub>9</sub></i> |                    |            |                       |               |                    |            |
|--------------------------------------------------|--------------------|------------|-----------------------|---------------|--------------------|------------|
| <i>Temperature (K)</i>                           | $R_g$ ( $\Omega$ ) | $C_g$ (nF) | $R_{gb}$ ( $\Omega$ ) | $C_{gb}$ (pF) | $CPE_c$ ( $\mu$ F) | $\alpha_c$ |
| 300                                              | 262                | 2.25       | 2502                  | 5.47          | 0.58               | 0.748      |
| 325                                              | 256                | 2.47       | 2148                  | 8.05          | 0.87               | 0.715      |
| 350                                              | 248                | 2.68       | 1794                  | 11.25         | 1.25               | 0.698      |
| 375                                              | 242                | 2.80       | 1444                  | 13.94         | 1.77               | 0.635      |
| 400                                              | 237                | 3.14       | 1095                  | 16.58         | 1.96               | 0.607      |
| <i>Rb<sub>3</sub>Bi<sub>2</sub>I<sub>9</sub></i> |                    |            |                       |               |                    |            |
| <i>Temperature (K)</i>                           | $R_g$ ( $\Omega$ ) | $C_g$ (nF) | $R_{gb}$ ( $\Omega$ ) | $C_{gb}$ (pF) | $CPE_c$ ( $\mu$ F) | $\alpha_c$ |
| 300                                              | 193                | 1.87       | 1884                  | 3.96          | 0.21               | 0.784      |
| 325                                              | 162                | 2.06       | 1635                  | 7.11          | 0.35               | 0.763      |
| 350                                              | 134                | 2.36       | 1383                  | 9.65          | 0.64               | 0.721      |
| 375                                              | 103                | 2.59       | 1137                  | 12.39         | 0.85               | 0.702      |
| 400                                              | 75                 | 2.99       | 885                   | 15.72         | 1.08               | 0.695      |

**Table S3.** Frequency-Dependent OLPT Parameters for Charge Transport in  $Cs_3Bi_2I_9$  Perovskite.

| <i>Frequency (Hz)</i> | $\alpha$ ( $\text{\AA}^{-1}$ ) | $W_{HO}$ (eV) | $N$ ( $cm^{-3}$ )     | $r_p$ ( $\text{\AA}$ ) | $R_\omega$ ( $\text{\AA}$ ) |
|-----------------------|--------------------------------|---------------|-----------------------|------------------------|-----------------------------|
| $10^2$                | 0.631                          | 0.512         | $5.73 \times 10^{28}$ | 1.241                  | 4.302                       |
| $10^3$                | 0.654                          | 0.509         | $6.15 \times 10^{28}$ | 1.208                  | 4.279                       |
| $10^4$                | 0.682                          | 0.487         | $6.37 \times 10^{28}$ | 1.174                  | 4.255                       |
| $10^5$                | 0.718                          | 0.464         | $6.96 \times 10^{28}$ | 1.159                  | 4.234                       |
| $10^6$                | 0.745                          | 0.451         | $7.44 \times 10^{28}$ | 1.146                  | 4.212                       |

**Table S4.** Frequency Dependence of Dielectric Permittivity ( $\epsilon_p$ ) and Hopping energy ( $W_H$ ) in  $\text{Cs}_3\text{Bi}_2\text{I}_9$ .

| <i>Frequency (Hz)</i> | <i><math>\epsilon_p (F.m^{-1})</math></i> | <i><math>W_H (eV)</math></i> |
|-----------------------|-------------------------------------------|------------------------------|
| $10^2$                | $5.95 \times 10^{-9}$                     | 0.294                        |
| $10^3$                | $6.21 \times 10^{-9}$                     | 0.286                        |
| $10^4$                | $6.74 \times 10^{-9}$                     | 0.273                        |
| $10^5$                | $7.08 \times 10^{-9}$                     | 0.259                        |
| $10^6$                | $7.25 \times 10^{-9}$                     | 0.231                        |

**Table S5.** Frequency Dependence of Charge Transport Parameters Extracted from the NSPT Model for  $\text{Rb}_3\text{Bi}_2\text{I}_9$ .

| <i>Frequency (Hz)</i> | <i><math>\alpha (\text{\AA}^{-1})</math></i> | <i><math>N(E_F) (eV^{-1} \text{cm}^{-3})</math></i> | <i><math>R_\omega (\text{\AA})</math></i> |
|-----------------------|----------------------------------------------|-----------------------------------------------------|-------------------------------------------|
| $10^2$                | 0.619                                        | $8.47 \times 10^{28}$                               | 4.214                                     |
| $10^3$                | 0.674                                        | $9.62 \times 10^{28}$                               | 3.963                                     |
| $10^4$                | 0.725                                        | $1.15 \times 10^{29}$                               | 3.767                                     |
| $10^5$                | 0.768                                        | $3.58 \times 10^{29}$                               | 3.534                                     |
| $10^6$                | 0.801                                        | $4.99 \times 10^{29}$                               | 3.312                                     |

## References

- [1] W. Li, X. Wang, J. Liao, Y. Jiang and D. Kuang, *Advanced Functional Materials*, 2020, 30, 1909701.
- [2] M. Xia, J. Yuan, G. Niu, X. Du, L. Yin, W. Pan, J. Luo, Z. Li, H. Zhao, K. Xue, X. Miao and J. Tang, *Advanced Functional Materials*, 2020, 30, 1910648.
